# Supplementary material for: 3-Phenyllactic Acid and Polyphenols Are Substances Enhancing the Antibacterial Effect of Methylglyoxal in Manuka Honey
Source: MDPI journal article supplement (doi:10.3390/foods12051098), 2023-03-04
Supplement: s1 [file s1]

# 3-Phenyllactic Acid and Polyphenols are Substances Enhancing the Antibacterial Effect of Methylglyoxal in Manuka Honey

Marcus Thierig <sup>1</sup>, Jana Raupbach <sup>1,2</sup>, Diana Wolf <sup>3</sup>, Thorsten Mascher <sup>3</sup>, Kannan Subramanian <sup>4</sup>, Thomas Henle<sup>1,\*</sup>

<sup>1</sup> Chair of Food Chemistry, Technische Universität Dresden, D-01062 Dresden, Germany

<sup>2</sup> Department of Molecular Toxicology, German Institute of Human Nutrition Potsdam-Rehbrücke (DIfE), D-14558 Nuthetal, Germany

<sup>3</sup> Chair of General Microbiology, Technische Universität Dresden, D-01062 Dresden, Germany

<sup>4</sup> Manuka Health New Zealand Limited, 66 Weona Court, Te Awamutu, New Zealand

\* Correspondence: thomas.henle@tu-dresden.de

## Supplementary materials

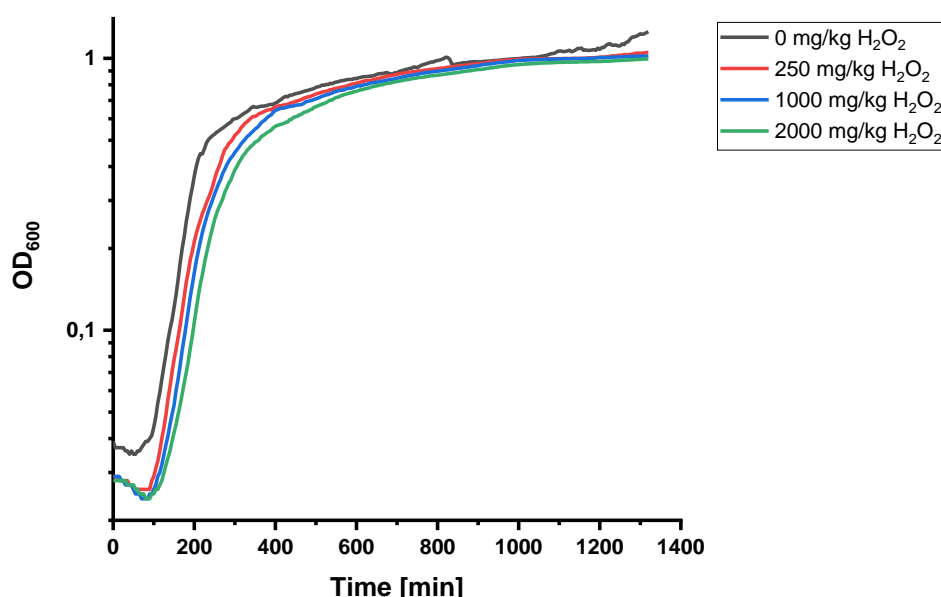

**Figure S1.** Growth curves of *B. subtilis* treated with LB-medium spiked with hydrogen peroxide

**Table S1.** Raw data of figure 2: MGO contents and growth delays (GD) in the assays for the determination of the antibacterial activity of different Manuka honeys against *B. subtilis*. Measurements were carried out in triplicates. Measurement uncertainty shows standard deviation.

| Honey dilution | Honey 1     |             | Honey 2     |             | Honey 3     |             | Honey 4     |             |
|----------------|-------------|-------------|-------------|-------------|-------------|-------------|-------------|-------------|
|                | MGO [µg/mL] | GD          |
| 1 %            | 1.94        | 1.36 ± 0.23 | 3.35        | 1.32 ± 0.02 | 3.81        | 1.29 ± 0.04 | 3.15        | 1.26 ± 0.05 |
| 2.5 %          | 4.85        | 1.51 ± 0.09 | 8.38        | 1.78 ± 0.02 | 9.53        | 1.53 ± 0.06 | 7.88        | 1.51 ± 0.06 |
| 5 %            | 9.70        | 2.06 ± 0.09 | 16.75       | 3.33 ± 0.04 | 19.05       | 2.47 ± 0.02 | 15.75       | 2.63 ± 0.14 |
| 7.5 %          | 14.55       | 2.94 ± 0.19 | 25.13       | 5.60 ± 0.43 | 28.58       | 4.19 ± 0.15 | 23.63       | 3.75 ± 0.11 |
| 10 %           | 19.40       | 3.92 ± 0.26 | 33.50       | 8.01 ± 0.45 | 38.10       | 6.36 ± 0.65 | 31.50       | 5.13 ± 0.30 |
| 12.5 %         | 24.25       | 4.79 ± 0.29 | 41.88       | no growth   | 47.63       | 8.15 ± 0.13 | 39.38       | 7.40 ± 0.21 |
| 15 %           | 29.30       | 6.28 ± 0.02 | 50.25       | no growth   | 57.15       | no growth   | 47.25       | no growth   |

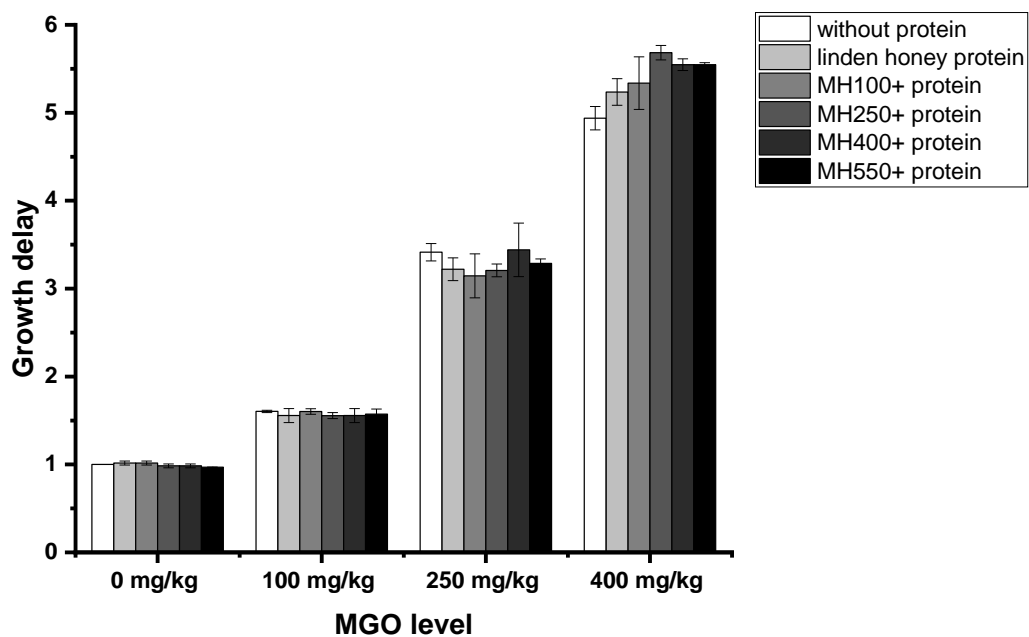

**Figure S2.** Growth delays of *B. subtilis* treated with 15 % (w/v, in LB medium) solutions of artificial honey, artificial honeys were spiked with MGO and no further protein or 0.1 % (w/v) protein extracted from linden honey and manuka honeys MH100+, MH250+, MH400+, and MH550+. Measurements were carried out in duplicates. Error bars show standard deviation.

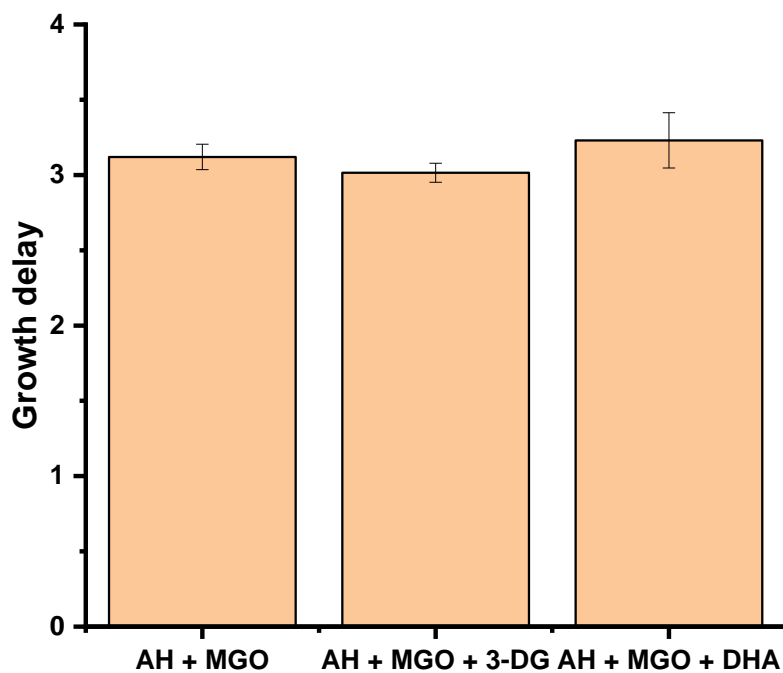

**Figure S3.** Growth delays of *B. subtilis* treated with 15 % (w/v, in LB medium) solutions artificial honeys, artificial honeys were spiked with 259 mg/kg MGO (AH+MGO) or 259 mg/kg MGO and 1620 mg/kg 3-deoxyglucosone (AH+MGO+3-DG) or 259 mg/kg MGO and 803 mg/kg dihydroxyacetone (AH+MGO+DHA). Measurements were carried out in duplicates. Error bars show standard deviation

**Table S2.** Raw data of figures 3 and 4: Growth delays of *B. subtilis* treated with 15 % solutions (w/v, in LB-medium) of artificial honey and Manuka honey 30+, respectively, honeys were spiked with MGO and 3-PLA. Measurements were carried out in quadruplicates. Measurement uncertainty shows standard deviation.

| MGO level          | PLA spike   |             |             |             |             |
|--------------------|-------------|-------------|-------------|-------------|-------------|
|                    | 0 mg/kg     | 500 mg/kg   | 1000 mg/kg  | 1500 mg/kg  | 2000 mg/kg  |
| Artificial honey   |             |             |             |             |             |
| 0 mg/kg            | 1.00 ± 0.08 | 1.07 ± 0.06 | 1.06 ± 0.08 | 1.06 ± 0.04 | 1.03 ± 0.02 |
| 100 mg/kg          | 1.58 ± 0.02 | 1.61 ± 0.02 | 1.58 ± 0.07 | 1.62 ± 0.06 | 1.50 ± 0.13 |
| 250 mg/kg          | 1.90 ± 0.06 | 2.48 ± 0.06 | 2.52 ± 0.06 | 2.68 ± 0.09 | 2.86 ± 0.09 |
| 400 mg/kg          | 4.06 ± 0.11 | 4.45 ± 0.14 | 4.62 ± 0.35 | 4.83 ± 0.23 | 5.05 ± 0.32 |
| Manuka honey MH30+ |             |             |             |             |             |
| 72 mg/kg           | 1.21 ± 0.06 | 1.28 ± 0.06 | 1.21 ± 0.06 | 1.27 ± 0.03 | 1.21 ± 0.05 |
| 172 mg/kg          | 1.95 ± 0.09 | 2.05 ± 0.11 | 2.21 ± 0.07 | 2.15 ± 0.05 | 1.95 ± 0.10 |
| 322 mg/kg          | 2.37 ± 0.11 | 3.17 ± 0.18 | 3.35 ± 0.12 | 3.46 ± 0.11 | 3.67 ± 0.12 |
| 472 mg/kg          | 5.64 ± 0.28 | 6.22 ± 0.54 | 6.41 ± 0.06 | 6.63 ± 0.22 | 6.85 ± 0.19 |

**Table S3.** Raw data of figure 5: MGO concentrations during the incubation (24 h at 37 °C) of 120 mg/L MGO solution in LB medium and in LB medium containing 600 mg/L 3-PLA. Measurements were carried out in triplicates. Measurement uncertainty shows standard deviation.

| Incubation time | MGO concentration [mg/L] |                     |
|-----------------|--------------------------|---------------------|
|                 | LB                       | LB + 600 mg/L 3-PLA |
| 0 h             | 121.7 ± 2.2              | 129.3 ± 0.6         |
| 1 h             | 103.3 ± 2.5              | 117.2 ± 4.4         |
| 3 h             | 61.7 ± 1.2               | 99.9 ± 5.6          |
| 5 h             | 53.1 ± 2.6               | 92.6 ± 1.0          |
| 8 h             | 39.3 ± 0.8               | 67.4 ± 0.8          |
| 24 h            | 7.3 ± 0.6                | 35.3 ± 0.2          |

**Table S4.** Raw data of figure 4: Growth delays of *B. subtilis* treated with 15 % solutions (w/v, in LB-medium) of artificial honey, honeys were spiked with MGO and gallic acid. Measurements were carried out in duplicates. Measurement uncertainty shows standard deviation.

| MGO level | Gallic acid spike |             |             |             |             |             |
|-----------|-------------------|-------------|-------------|-------------|-------------|-------------|
|           | 0 mg/kg           | 100 mg/kg   | 500 mg/kg   | 1000 mg/kg  | 1500 mg/kg  | 2000 mg/kg  |
| 0 mg/kg   | 1.00 ± 0.00       | 0.98 ± 0.02 | 0.98 ± 0.02 | 0.98 ± 0.02 | 0.98 ± 0.02 | 0.95 ± 0.02 |
| 100 mg/kg | 1.60 ± 0.01       | 1.57 ± 0.10 | 1.64 ± 0.06 | 1.60 ± 0.06 | 1.64 ± 0.10 | 1.70 ± 0.02 |
| 250 mg/kg | 3.41 ± 0.10       | 3.54 ± 0.19 | 3.62 ± 0.12 | 3.79 ± 0.11 | 4.06 ± 0.13 | 4.17 ± 0.19 |
| 400 mg/kg | 4.94 ± 0.13       | 4.92 ± 0.25 | 5.41 ± 0.19 | 5.48 ± 0.24 | 5.66 ± 0.10 | no growth   |

**Table S5.** Growth delays of *B. subtilis* treated with artificial honey spiked with 259 mg/kg MGO (AH+MGO), artificial honey spiked with 259 mg/kg MGO and 467 mg/kg PLA (AH+MGO+PLA) and commercial MH250+ manuka honey with 259 mg/kg MGO and 467 mg/kg PLA (MH250+) in dependence on the MGO content in the assay. Measurements were carried out in triplicates. Measurement uncertainty shows standard deviation.

| <b>MGO</b>  | <b>AH+MGO</b> | <b>AH+MGO+3-PLA</b> | <b>MH250+</b> |
|-------------|---------------|---------------------|---------------|
| 6.83 µg/mL  | 1.13 ± 0.03   | 1.14 ± 0.03         | 1.28 ± 0.04   |
| 13.67 µg/mL | 1.51 ± 0.12   | 1.44 ± 0.06         | 2.10 ± 0.32   |
| 20.50 µg/mL | 2.22 ± 0.01   | 2.14 ± 0.08         | 3.88 ± 0.40   |
| 27.33 µg/mL | 3.20 ± 0.12   | 3.41 ± 0.11         | 6.20 ± 0.32   |
| 34.16 µg/mL | 3.92 ± 0.22   | 4.27 ± 0.12         | 7.71 ± 0.33   |
| 41.00 µg/mL | 4.94 ± 0.15   | 5.45 ± 0.15         | no growth     |
